# Supplementary material for: Genome-wide association analysis reveals genetic variations and candidate genes associated with salt tolerance related traits in Gossypium hirsutum
Source: Research Square preprint supplement (doi:10.21203/rs.3.rs-66236/v3), 2020-12-04
Supplement: Supplementary file 1 [file 326b76c6a606fe3f789ed95c.xlsx]

## Sheet: Sheet1
Table S4 The specific primers for qRT-PCR and Virus-induced gene silencing assay
Primer name	Sequence	Assay
GH_A08G0488_QRT_F	GTTGGTTATTGTTCTCATCCTAT	qRT-PCR
GH_A08G0488_QRT_R	TTCACAGAAGATTGTCCTCA
GH_A10G1620_QRT_F	CAAATGGTAATGGCAGAGATAA
GH_A10G1620_QRT_R	AATCCTTCCGTTTCCTACTTA
GH_A13G0171_QRT_F	AAGTTGTAATCAGAGCCATTC
GH_A13G0171_QRT_R	TTCCATTGAGATTGAAGCATAT
Actin_F	ATCCTCCGTCTTGACCTTG
Actin_R	TGTCCGTCAGGCAACTCAT
GH_A08G0488_VIGS_F	CGGAATTCATGAAAGTAGTTATGTGGGGAA	VIGS
GH_A08G0488_VIGS_R	CGGGATCCCCGTTTTCTCATACTAGACTGG
GH_A10G1620_VIGS_F	CGGAATTCATCTGCCACCCTTTCTATGCCA
GH_A10G1620_VIGS_R	CGGGATCCTCCAATGTTCTCCACTGCTCCA
GH_A13G0171_VIGS_F	CGGAATTCTCCCTATTTTGGCACCATTACC
GH_A13G0171_VIGS_R	CGGGATCCAAACAAGGCTTCCATTGAGATT
